# Supplementary material
Source: Springer Nature journal article supplement (https://www.springermedizin.de/resource/supplementary/12891_2013_2153_MOESM1_ESM.pdf/9509536)

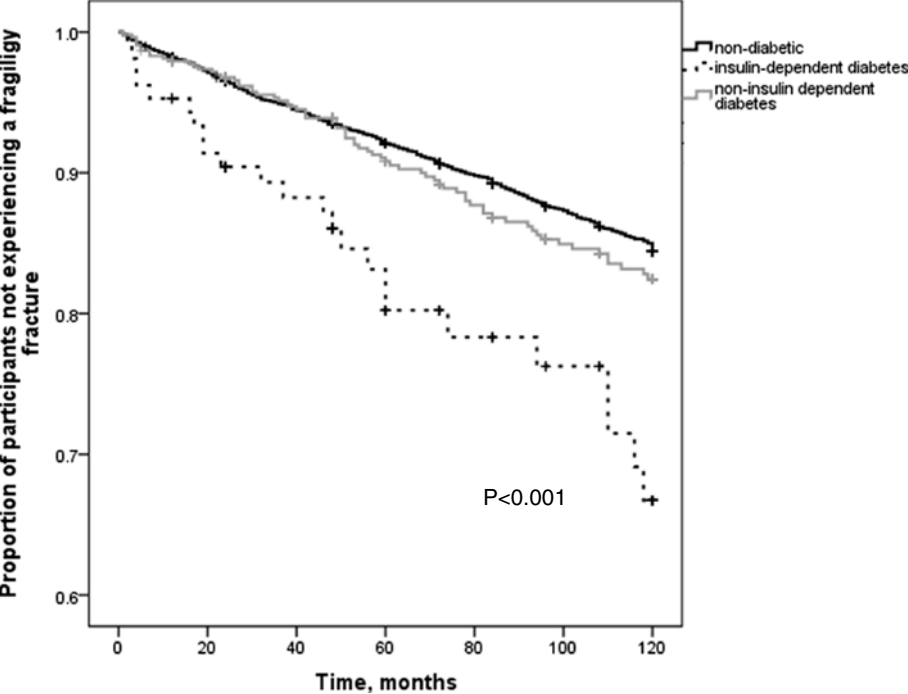

P-value from the log-rank test

Supplement: MOESM1 [file 9509536]
